# Supplementary material for: Blastospores from Metarhizium anisopliae and Metarhizium rileyi Are Not Always as Virulent as Conidia Are towards Spodoptera frugiperda Caterpillars and Use Different Infection Mechanisms
Source: MDPI journal article supplement (doi:10.3390/microorganisms11061594), 2023-06-16
Supplement: s1 [file s1]

**Table S3.** Up-regulated Protein families and their general functions expressed in *Metarhizium anisopliae* and *Metarhizium rileyi* propagules during penetration on *Spodoptera frugiperda* cuticle.

|                                                                  | Total | PFAMs   | Protein Name                                    | Function                         |
|------------------------------------------------------------------|-------|---------|-------------------------------------------------|----------------------------------|
| Shared by all structures                                         | 1     | PF00067 | Cytochrome P450 4F5                             | Oxidative stress                 |
| Shared by <i>M. anisopliae</i> blastospores and conidia          | 1     | PF00172 | Zn(2)-C6 fungal-type DNA-binding domain         | Cell function                    |
| Shared by <i>M. rileyi</i> blastospores and conidia              | 3     | PF00155 | Aminotransferase, class I/classII               | Oxidative stress                 |
|                                                                  |       | PF13499 | EF-hand domain                                  | Virulence factor                 |
|                                                                  |       | PF13641 | Glycosyltransferase like family 2               | Oxidative stress                 |
| Shared by <i>M. anisopliae</i> and <i>M. rileyi</i> blastospores | 1     | PF00011 | Heat shock protein                              | Heat shock                       |
| Shared by <i>M. anisopliae</i> and <i>M. rileyi</i> conidia      | 19    | PF00171 | Aldehyde dehydrogenase domain                   | Virulence factor                 |
|                                                                  |       | PF01198 | Ribosomal protein L31e                          | Cell function                    |
|                                                                  |       | PF02629 | CoA-binding                                     | Virulence factor                 |
|                                                                  |       | PF00903 | Glyoxalase/fosfomycin resistance/dioxygenase do | Virulence factor                 |
|                                                                  |       | PF11327 | Egh16-like virulence factor                     | Virulence factor                 |
|                                                                  |       | PF01775 | Ribosomal protein 50S-L18Ae/60S-L20/60S-L18A    | Cell function                    |
|                                                                  |       | PF01425 | Amidase signature domain                        | Virulence factor                 |
|                                                                  |       | PF02353 | Mycolic acid cyclopropane synthetase            | Virulence factor                 |
|                                                                  |       | PF01042 | Endoribonuclease L-PSP                          | Cell function                    |
|                                                                  |       | PF00096 | Zinc finger C2H2-type                           | Cell function                    |
|                                                                  |       | PF01384 | Phosphate transporter                           | Nutrient and substance transport |
|                                                                  |       | PF05368 | NmrA-like domain                                | Cell function                    |
|                                                                  |       | PF13193 | AMP-binding enzyme, C-terminal domain           | Virulence factor                 |
|                                                                  |       | PF00125 | Histone H2A/H2B/H3                              | Virulence factor                 |
|                                                                  |       | PF00153 | Mitochondrial substrate/solute carrier          | Cell function                    |
|                                                                  |       | PF07732 | Multicopper oxidase, N-termianl                 | Virulence factor                 |
|                                                                  |       | PF03576 | Peptidase S58, DmpA                             | Virulence factor                 |
|                                                                  |       | PF02136 | Nuclear transport factor 2                      | Nutrient and substance transport |
|                                                                  |       | PF13561 | Enoyl-(Acyl carrier protein) reductase          | Cell function                    |

Blastospores from *Metarhizium anisopliae* and *Metarhizium rileyi* are not always as virulent as conidia towards *Spodoptera frugiperda* caterpillars and use different infection mechanisms. Isabella Alice Gotti, Camila Costa Moreira, Italo Delalibera Junior, and Henrik H. De Fine Licht
