# Supplementary material for: Blastospores from Metarhizium anisopliae and Metarhizium rileyi Are Not Always as Virulent as Conidia Are towards Spodoptera frugiperda Caterpillars and Use Different Infection Mechanisms
Source: MDPI journal article supplement (doi:10.3390/microorganisms11061594), 2023-06-16
Supplement: s1 [file s1]

**Table S2.** Summary of RNA-Seq read filtering and mapping with *Spodoptera frugiperda* reference genome. Values represent each of the five biological replicates for each treatment. All the samples were mapped with the *S. frugiperda* reference genome: GCA\_019297735.1

| Sample | Treatment                                                                         | Number of Input Reads | Uniquely mapped Reads (%) | Reads mapped to too many loci (%) | Unmapped reads (%) |
|--------|-----------------------------------------------------------------------------------|-----------------------|---------------------------|-----------------------------------|--------------------|
| 1      | <i>Spodoptera frugiperda</i> cuticle + <i>Metarhizium anisopliae</i> blastospores | 17546491              | 68,42%                    | 0,06%                             | 23,59%             |
| 2      | <i>Spodoptera frugiperda</i> cuticle + <i>Metarhizium anisopliae</i> blastospores | 15707692              | 66,08%                    | 0,15%                             | 25,91%             |
| 3      | <i>Spodoptera frugiperda</i> cuticle + <i>Metarhizium anisopliae</i> blastospores | 14700702              | 66,56%                    | 0,11%                             | 26,32%             |
| 4      | <i>Spodoptera frugiperda</i> cuticle + <i>Metarhizium anisopliae</i> blastospores | 17887751              | 66,43%                    | 0,11%                             | 25,96%             |
| 5      | <i>Spodoptera frugiperda</i> cuticle + <i>Metarhizium anisopliae</i> blastospores | 13441206              | 67,80%                    | 0,13%                             | 23,98%             |
| 6      | <i>Spodoptera frugiperda</i> cuticle + <i>Metarhizium anisopliae</i> conidia      | 15590528              | 67,48%                    | 0,05%                             | 25,75%             |
| 7      | <i>Spodoptera frugiperda</i> cuticle + <i>Metarhizium anisopliae</i> conidia      | 15827454              | 64,15%                    | 0,06%                             | 28,21%             |
| 8      | <i>Spodoptera frugiperda</i> cuticle + <i>Metarhizium anisopliae</i> conidia      | 16581026              | 62,82%                    | 0,06%                             | 30,52%             |
| 9      | <i>Spodoptera frugiperda</i> cuticle + <i>Metarhizium anisopliae</i> conidia      | 16126915              | 67,18%                    | 0,06%                             | 21,76%             |
| 10     | <i>Spodoptera frugiperda</i> cuticle + <i>Metarhizium anisopliae</i> conidia      | 16526741              | 66,13%                    | 0,08%                             | 22,96%             |
| 11     | <i>Spodoptera frugiperda</i> cuticle + <i>Metarhizium rileyi</i> blastospores     | 17187484              | 68,97%                    | 0,12%                             | 21,31%             |
| 12     | <i>Spodoptera frugiperda</i> cuticle + <i>Metarhizium rileyi</i> blastospores     | 15696812              | 71,16%                    | 0,15%                             | 21,56%             |
| 13     | <i>Spodoptera frugiperda</i> cuticle + <i>Metarhizium rileyi</i> blastospores     | 16335133              | 75,19%                    | 0,09%                             | 17,07%             |
| 14     | <i>Spodoptera frugiperda</i> cuticle + <i>Metarhizium rileyi</i> blastospores     | 15418547              | 72,16%                    | 0,09%                             | 20,43%             |
| 15     | <i>Spodoptera frugiperda</i> cuticle + <i>Metarhizium rileyi</i> blastospores     | 17557909              | 70,08%                    | 0,15%                             | 20,43%             |
| 16     | <i>Spodoptera frugiperda</i> cuticle + <i>Metarhizium rileyi</i> conidia          | 17161999              | 68,81%                    | 0,09%                             | 24,35%             |
| 17     | <i>Spodoptera frugiperda</i> cuticle + <i>Metarhizium rileyi</i> conidia          | 15831745              | 70,15%                    | 0,13%                             | 20,28%             |
| 18     | <i>Spodoptera frugiperda</i> cuticle + <i>Metarhizium rileyi</i> conidia          | 17313507              | 66,22%                    | 0,10%                             | 23,39%             |
| 19     | <i>Spodoptera frugiperda</i> cuticle + <i>Metarhizium rileyi</i> conidia          | 14814037              | 68,07%                    | 0,12%                             | 21,03%             |
| 20     | <i>Spodoptera frugiperda</i> cuticle + <i>Metarhizium rileyi</i> conidia          | 14797306              | 72,48%                    | 0,13%                             | 21,25%             |

**Blastospores from *Metarhizium anisopliae* and *Metarhizium rileyi* are not always as virulent as conidia towards *Spodoptera frugiperda* caterpillars and use different infection mechanisms.** Isabella Alice Gotti, Camila Costa Moreira, Italo Delalibera Junior, and Henrik H. De Fine Licht
