# Supplementary material for: Blastospores from Metarhizium anisopliae and Metarhizium rileyi Are Not Always as Virulent as Conidia Are towards Spodoptera frugiperda Caterpillars and Use Different Infection Mechanisms
Source: MDPI journal article supplement (doi:10.3390/microorganisms11061594), 2023-06-16
Supplement: s1 [file s1]

**Table S1.** Summary of RNA-Seq read filtering and mapping. Values represent each of the five biological replicates for each treatment. Samples 1 – 10 were mapped with the *Metarhizium anisopliae* reference genome: GCA\_013305495.1. Samples 11 – 20 were mapped with the *Metarhizium rileyi* reference genome: GCA\_007866325.1.

| Sample | Treatment                                                                         | Number of Input Reads | Uniquely mapped Reads (%) | Reads mapped to too many loci (%) | Unmapped reads (%) |
|--------|-----------------------------------------------------------------------------------|-----------------------|---------------------------|-----------------------------------|--------------------|
| 1      | <i>Spodoptera frugiperda</i> cuticle + <i>Metarhizium anisopliae</i> blastospores | 17582304              | 0.14%                     | 0,36%                             | 99,03%             |
| 2      | <i>Spodoptera frugiperda</i> cuticle + <i>Metarhizium anisopliae</i> blastospores | 15741262              | 0.15%                     | 0,30%                             | 99,07%             |
| 3      | <i>Spodoptera frugiperda</i> cuticle + <i>Metarhizium anisopliae</i> blastospores | 14721168              | 0.10%                     | 0,24%                             | 99,26%             |
| 4      | <i>Spodoptera frugiperda</i> cuticle + <i>Metarhizium anisopliae</i> blastospores | 17926588              | 0.15%                     | 0,28%                             | 99,11%             |
| 5      | <i>Spodoptera frugiperda</i> cuticle + <i>Metarhizium anisopliae</i> blastospores | 13467826              | 0.14%                     | 0,35%                             | 98,91%             |
| 6      | <i>Spodoptera frugiperda</i> cuticle + <i>Metarhizium anisopliae</i> conidia      | 15694999              | 0.57%                     | 0,32%                             | 98,66%             |
| 7      | <i>Spodoptera frugiperda</i> cuticle + <i>Metarhizium anisopliae</i> conidia      | 15941969              | 0.63%                     | 0,55%                             | 98,09%             |
| 8      | <i>Spodoptera frugiperda</i> cuticle + <i>Metarhizium anisopliae</i> conidia      | 16652007              | 0.36%                     | 0,30%                             | 98,89%             |
| 9      | <i>Spodoptera frugiperda</i> cuticle + <i>Metarhizium anisopliae</i> conidia      | 16245901              | 0.55%                     | 0,91%                             | 97,35%             |
| 10     | <i>Spodoptera frugiperda</i> cuticle + <i>Metarhizium anisopliae</i> conidia      | 16604615              | 0.36%                     | 0,65%                             | 98,12%             |
| 11     | <i>Spodoptera frugiperda</i> cuticle + <i>Metarhizium rileyi</i> blastospores     | 17243904              | 0.32%                     | 0,00%                             | 99,67%             |
| 12     | <i>Spodoptera frugiperda</i> cuticle + <i>Metarhizium rileyi</i> blastospores     | 15728103              | 0.19%                     | 0,00%                             | 99,80%             |
| 13     | <i>Spodoptera frugiperda</i> cuticle + <i>Metarhizium rileyi</i> blastospores     | 16375249              | 0.23%                     | 0,00%                             | 99,75%             |
| 14     | <i>Spodoptera frugiperda</i> cuticle + <i>Metarhizium rileyi</i> blastospores     | 15457153              | 0.24%                     | 0,00%                             | 99,75%             |
| 15     | <i>Spodoptera frugiperda</i> cuticle + <i>Metarhizium rileyi</i> blastospores     | 17595338              | 0.20%                     | 0,00%                             | 99,79%             |
| 16     | <i>Spodoptera frugiperda</i> cuticle + <i>Metarhizium rileyi</i> conidia          | 17249224              | 0.49%                     | 0,00%                             | 99,49%             |
| 17     | <i>Spodoptera frugiperda</i> cuticle + <i>Metarhizium rileyi</i> conidia          | 15896404              | 0.40%                     | 0,00%                             | 99,59%             |
| 18     | <i>Spodoptera frugiperda</i> cuticle + <i>Metarhizium rileyi</i> conidia          | 17481701              | 0.95%                     | 0,00%                             | 99,04%             |
| 19     | <i>Spodoptera frugiperda</i> cuticle + <i>Metarhizium rileyi</i> conidia          | 14985625              | 1.12%                     | 0,00%                             | 98,85%             |
| 20     | <i>Spodoptera frugiperda</i> cuticle + <i>Metarhizium rileyi</i> conidia          | 14836469              | 0.25%                     | 0,00%                             | 99,74%             |

**Blastospores from *Metarhizium anisopliae* and *Metarhizium rileyi* are not always as virulent as conidia towards *Spodoptera frugiperda* caterpillars and use different infection mechanisms.** Isabella Alice Gotti, Camila Costa Moreira, Italo Delalibera Junior, and Henrik H. De Fine Licht
